# Supplementary material
Source: MDPI journal article supplement (https://www.mdpi.com/2071-1050/12/12/5041)
Supplement: s1 [file s1]

## Supplementary Materials

# **Towards Urban Mining – Estimating the potential environmental benefits by applying an alternative construction practice. A case study from Switzerland.**

Efstathios Kakkos<sup>1\*</sup>, Felix Heisel<sup>2</sup>, Dirk Hebel<sup>3</sup>, Roland Hischier<sup>1</sup>

<sup>1</sup> Swiss Federal Laboratories for Materials Science and Technology (Empa), Technology and Society Laboratory (TSL), Lerchenfeldstrasse 5, 9014 St. Gallen, Switzerland

<sup>2</sup> Cornell University, Circular Construction Lab, Department of Architecture, Cornell AAP, 235E. Sibley Hall, Ithaca, NY 14853, USA

<sup>3</sup> Karlsruher Institut für Technologie, Fachgebiet Nachhaltiges Bauen, Institut Entwerfen und Bautechnik, Fakultät für Architektur, Englerstrasse 11, 76131 Karlsruhe, Germany

\*Contact: [efstathios.kakkos@empa.ch](mailto:efstathios.kakkos@empa.ch)

## **Table of Content**

|                                                   |   |
|---------------------------------------------------|---|
| 1. Residential building types in Switzerland..... | 1 |
| 2. Life Cycle Inventory (LCI). ....               | 1 |
| 2.1. Material calculation (A1-A3) .....           | 1 |
| 2.2. Transport (A4, C2) .....                     | 3 |
| 2.3. Construction & Deconstruction (A5, C1).....  | 4 |
| 2.4. Material replacement (B4).....               | 4 |
| 2.5. Energy consumption of buildings (B6) .....   | 5 |
| 2.6. End of life stage (C2-4) .....               | 5 |
| 2.7. Reuse / recovery potential (D).....          | 7 |
| 3. Results .....                                  | 8 |

|                    |   |
|--------------------|---|
| 4. References..... | 9 |
|--------------------|---|

In total 9 pages with 10 tables and 1 figure.

1    **1. Residential building types in Switzerland.**

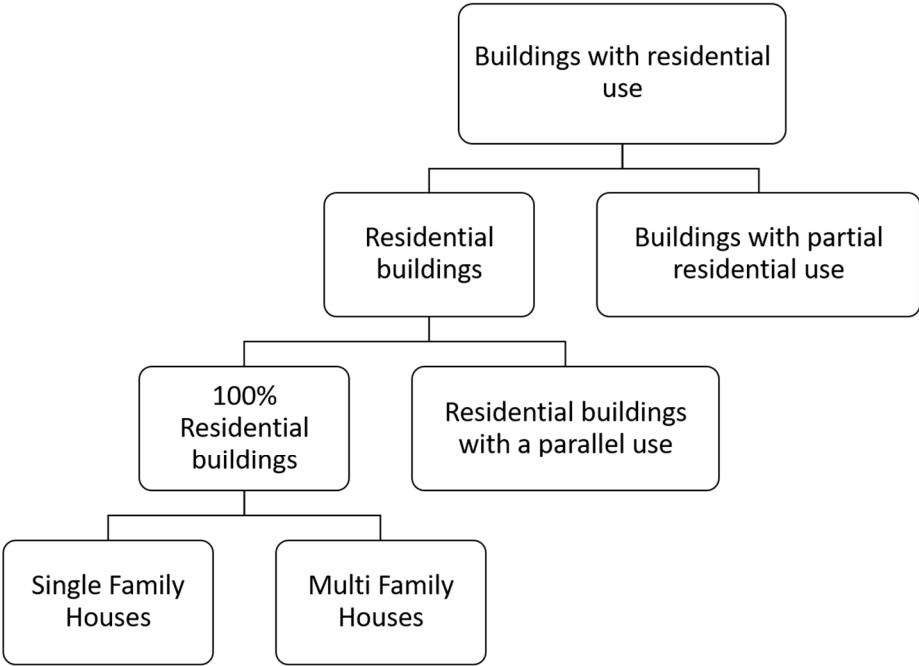

2  
3    **Figure S1.** Types of buildings in Switzerland (Bundesamt für Statistik, 2017).

4    **2. Life Cycle Inventory (LCI).**

5    This section provides foreground data about material, transport, construction, energy  
6    and demolition waste (CDW) calculation of all buildings considered for the study and  
7    reports the key assumptions behind these calculations. The densities included in the  
8    following tables were taken from the KBOB list (KBOB, 2014), which includes life cycle  
9    assessment data on a variety of building materials. The density of the mushroom pan-  
10    els are the exception to this case, as it was not included on the list due to the fact that  
11    is a novel material. Hence, its density derives from the company Evocative design.

12    2.1.    *Material calculation (A1-A3)*

13    As a simplification, only materials that are essential for the construction of the back-  
14    bone of the different default buildings are introduced into the analysis (summarized  
15    in tables Table S1 and

16    Table S2). As reported in the main text, aspects such as mechanical and electrical  
17    equipment or (inside/outside) paints are not taken into consideration for this study  
18    here, because most of them could be assumed to be similar in all cases. Doors, window

frames and stairs are excluded from the study, based on the Swiss Standards for the calculation of the grey energy of buildings, i.e. the SIA 2032 standard (SIA, 2010). Further suggestions reported in this standard (such as the calculation of external walls without a deduction for the windows, or the calculation of internal walls without a deduction for the doors) are not taken into account. Materials for foundation have not been taken into consideration due to the variety of buildings and – as a result – variety of foundation options that would be required between the lightweight SFH and heavyweight SFH.

**Table S1.** Material quantity calculation for the circular modeled buildings.

| Materials             | Density<br>(kg/m <sup>3</sup> ) | Volume (m <sup>3</sup> ) |       |       |                |                |                |
|-----------------------|---------------------------------|--------------------------|-------|-------|----------------|----------------|----------------|
|                       |                                 | 1-floor SFH              |       |       | 2-floor<br>SFH | 3-floor<br>SFH | 3-floor<br>MFH |
|                       |                                 | ESR =                    | ESR = | ESR = | ESR =          | ESR =          | ESR =          |
|                       |                                 | 1                        | 1.5   | 2.5   | 1.5            | 1.5            | 1.5            |
| Wooden facade         | 600                             | 3.32                     | 3.40  | 3.68  | 4.62           | 5.46           | 11.75          |
| Wooden formwork       | 600                             | 17.57                    | 18.00 | 18.34 | 27.37          | 29.66          | 84.82          |
| Wooden beams          | 600                             | 15.44                    | 15.97 | 15.44 | 12.67          | 22.35          | 31.24          |
| Stonewool insulation  | 100                             | 86.89                    | 88.01 | 89.28 | 79.78          | 78.78          | 273.43         |
| Vapor barrier         | 920                             | 0.09                     | 0.09  | 0.09  | 0.09           | 0.09           | 0.25           |
| Straw mushroom panels | 122                             | 6.52                     | 7.98  | 8.11  | 6.35           | 10.46          | 40.36          |
| Ceiling boards        | 600                             | 9.60                     | 9.60  | 9.60  | 14.40          | 16.00          | 60.00          |
| Wooden floor          | 600                             | 3.00                     | 3.00  | 3.00  | 1.50           | 1.00           | 3.75           |
| Cooper roof           | 8900                            | 0.07                     | 0.07  | 0.07  | 0.03           | 0.02           | 0.08           |
| Double glazing        | 2573                            | 0.24                     | 0.24  | 0.27  | 0.48           | 0.72           | 0.72           |
| UV foil               | 1700                            | 0.02                     | 0.02  | 0.02  | 0.02           | 0.03           | 0.06           |

**Table S2.** Material quantity calculation for the conventional modeled SFH (ESR = 1.5).

| Materials                          | Density (kg/m <sup>3</sup> ) | Volume (m <sup>3</sup> ) |         |         |
|------------------------------------|------------------------------|--------------------------|---------|---------|
|                                    |                              | 1-floor                  | 2-floor | 3-floor |
| Wooden protective layer            | 600                          | 3.27                     | 4.44    | 5.25    |
| Concrete                           | 2420                         | 69.12                    | 63.60   | 63.56   |
| Wooden supporting beams (30X60 mm) | 600                          | 0.24                     | 0.34    | 0.41    |
| EPS                                | 30                           | 85.10                    | 79.25   | 80.75   |
| Vapor barrier                      | 920                          | 0.02                     | 0.02    | 0.02    |
| Gypsum fiberboard                  | 850                          | 1.12                     | 1.26    | 1.42    |
| Bricks                             | 1845                         | 11.15                    | 12.57   | 14.16   |
| Stucco                             | 1500                         | 1.07                     | 1.21    | 1.36    |
| Cover plaster                      | 1200                         | 0.89                     | 1.01    | 1.13    |
| Wooden formwork                    | 600                          | 0.00                     | 1.50    | 2.00    |
| Cement plaster                     | 1850                         | 9.60                     | 4.80    | 3.20    |
| Aggregates                         | 2000                         | 6.00                     | 3.00    | 2.00    |

|                   |      |      |      |      |
|-------------------|------|------|------|------|
| Bitumen           | 1100 | 1.44 | 0.72 | 0.48 |
| Reinforcing steel | 7850 | 0.69 | 0.64 | 0.64 |
| Double glazing    | 2573 | 0.24 | 0.48 | 0.72 |

## 2.2. Transport (A4, C2)

For the transport of materials (see Table S3 and Table S4) from the production companies to the building site and from the building site to treatment facilities, trucks were considered, with a covered distance of 100 km.

**Table S3.** Transport estimation for circular building materials.

| Materials                        | Density<br>(kg/m <sup>3</sup> ) | Transport (tkm) |        |        |                |                |                |
|----------------------------------|---------------------------------|-----------------|--------|--------|----------------|----------------|----------------|
|                                  |                                 | 1-floor SFH     |        |        | 2-floor<br>SFH | 3-floor<br>SFH | 3-floor<br>MFH |
|                                  |                                 | ESR =           | ESR =  | ESR =  | ESR =          | ESR =          | ESR =          |
|                                  |                                 | 1               | 1.5    | 2.5    | 1.5            | 1.5            | 1.5            |
| Wooden facade                    | 600                             | 199.4           | 204.1  | 220.7  | 277.2          | 327.8          | 705.1          |
| Wooden formwork                  | 600                             | 1054.2          | 1080.1 | 1100.1 | 1642.0         | 1779.6         | 5089.2         |
| Wooden beams                     | 600                             | 926.2           | 958.3  | 926.2  | 760.0          | 1340.7         | 1874.5         |
| Stonewool insulation             | 100                             | 868.9           | 880.1  | 892.8  | 797.8          | 787.8          | 2734.3         |
| Vapor barrier                    | 920                             | 8.5             | 8.6    | 8.7    | 8.1            | 8.1            | 23.2           |
| Straw mushroom panels            | 122                             | 79.6            | 97.3   | 98.9   | 77.4           | 127.7          | 492.3          |
| Wooden roof boards               | 600                             | 576.0           | 576.0  | 576.0  | 864.0          | 960.0          | 3600.0         |
| Wooden floor                     | 600                             | 180.0           | 180.0  | 180.0  | 90.0           | 60.0           | 225.0          |
| Cooper roof                      | 8900                            | 59.7            | 59.7   | 59.7   | 29.8           | 19.9           | 74.6           |
| Double glazing                   | 2573                            | 61.4            | 61.4   | 69.4   | 122.8          | 184.2          | 185.3          |
| UV foil                          | 1700                            | 2.7             | 2.8    | 3.0    | 3.8            | 4.5            | 9.6            |
| Total transport to building site |                                 | 4016.5          | 4108.3 | 4135.5 | 4672.8         | 5600.2         | 15013.1        |

**Table S4.** Transport estimation for the conventional buildings with ESR = 1.5.

| Materials               | Density<br>(kg/m <sup>3</sup> ) | Transport (tkm) |         |         |
|-------------------------|---------------------------------|-----------------|---------|---------|
|                         |                                 | 1-floor         | 2-floor | 3-floor |
| Wooden protective layer | 600                             | 195.9           | 266.1   | 314.9   |
| Concrete                | 2420                            | 16725.9         | 15391.4 | 15380.6 |
| Wooden beams (30X60 mm) | 600                             | 14.2            | 20.2    | 24.8    |
| EPS                     | 30                              | 255.3           | 237.8   | 242.2   |
| Vapor barrier           | 920                             | 2.2             | 2.2     | 2.2     |
| Gypsum fiberboard       | 850                             | 94.8            | 106.8   | 120.4   |
| Bricks                  | 1845                            | 2057.2          | 2318.7  | 2612.8  |
| Stucco                  | 1500                            | 160.6           | 181.0   | 203.9   |
| Cover plaster           | 1200                            | 107.0           | 120.6   | 135.9   |
| Wooden formwork         | 600                             | 0.0             | 90.0    | 120.0   |
| Cement plaster          | 1850                            | 1776.0          | 888.0   | 592.0   |

|                                  |      |         |         |         |
|----------------------------------|------|---------|---------|---------|
| Aggregates                       | 2000 | 1200.0  | 600.0   | 400.0   |
| Bitumen                          | 1100 | 158.4   | 79.2    | 52.8    |
| Reinforcing steel                | 7850 | 542.6   | 499.3   | 498.9   |
| Double glazing                   | 2573 | 61.4    | 122.8   | 184.2   |
| Total transport to building site |      | 23351.4 | 20924.0 | 20885.6 |

### 2.3. Construction & Deconstruction (A5, C1)

The design-for-disassembly concept not only allows for easier construction and deconstruction of the buildings, which leads subsequently to lower environmental impact during those stages but also allows for minimum loss of materials during those stages and as a result maximum recovery of those materials that can either be utilized. Hence, it minimizes the usage of building equipment and time for the installation process. The assumptions for the construction and installation of building elements are shown in Table S5. Prefabrication of elements for this study has not been considered due to lack of data. For the deconstruction phase, concrete mixer is replaced by an excavation skid-steel loader but in principle remains the same. Preparatory works for foundation are not taken into account.

**Table S5.** Construction equipment for wooden and concrete buildings.

| Circular (wooden) buildings           |           |         |                |           |         |
|---------------------------------------|-----------|---------|----------------|-----------|---------|
| SFH                                   |           |         | MFH            |           |         |
| Operation (hr)                        | Machinery |         | Operation (hr) | Machinery |         |
|                                       | Crane     |         |                | Crane     |         |
| 15                                    | Drills    | (500 W) | 20             | Drills    | (500 W) |
| Conventional (concrete) SFH buildings |           |         |                |           |         |
| Operation (hr)                        |           |         | Machinery      |           |         |
| 10                                    |           |         | Concrete mixer |           |         |
|                                       |           |         | Drills (500 W) |           |         |

### 2.4. Material replacement (B4)

The replacement stage gains significant value, especially when an appropriate Design-for-Disassembly concept is placed at the center of the design, early from the planning phase of the building. Apart from the time and construction flexibility it provides, it gives the opportunity to easily replace any defect building element even during operation of the said building, avoiding that way a repair of an element or even a total refurbishment of the building, if needed. Therefore, replacement is considered for both

concrete and wooden buildings and conforms to again to the Swiss standard for grey energy of buildings (SIA, 2010). Table S6 again provides an overview of the replaced materials. All principal activities connected with material replacement such as production of the new element, transport and integration to building site, treatment of the element. Reuse potential is included in module D.

**Table S6.** Replaced elements considered for circular and conventional buildings.

| Replacing elements | Element lifetime | Replacement magnitude |
|--------------------|------------------|-----------------------|
| Window glazing     | 30               | 1                     |
| UV foil            | 30               | 1                     |
| Outside fassade    | 40               | 1                     |

## 2.5. Energy consumption of buildings (B6)

Table S7 exhibits the annual electricity and thermal energy required by the circular and conventional buildings. The detailed estimation of the modeled buildings' energy consumption is out of the scope of this study. The energy demand of each building is assessed through the use of SIA 2024 building tool, which conforms to SIA 2024 standard (SIA, 2015), which provides reference values for all aspects of building-related energy consumption. The provided standard values were used for an average calculation of each building's energy demand. The electricity country mix of Switzerland provided within the Ecoinvent database v3.4 ("Ecoinvent Data v3.4-Recycled-Content System Model," 2017) is considered for domestic use, while the (underfloor) heating and domestic hot water demand was covered through the use of heat pump.

**Table S7.** Annual energy consumption per gross floor area of the model buildings according to SIA 2024 building tool.

| Building type | Total electricity (kWh <sub>e</sub> / m <sup>2</sup> ) |          |             | Total thermal energy (kWh <sub>th</sub> / m <sup>2</sup> ) |         |                    |
|---------------|--------------------------------------------------------|----------|-------------|------------------------------------------------------------|---------|--------------------|
|               | Appliances                                             | Lighting | Ventilation | Cooling                                                    | Heating | Domestic hot water |
| SFH           | 14.2                                                   | 4.0      | 1.0         | 0.0                                                        | 28.8    | 13.5               |
| MFH           | 13.8                                                   | 4.5      | 1.7         | 0.0                                                        | 19.0    | 19.2               |

## 2.6. End-of-life stage (C2-4)

The end-of-life stage of a building commences with its demolition (conventional buildings) or deconstruction (circular buildings) and ends with the treatment of its individual materials or disposal of its small fraction that cannot be treated. Transport of the CDW to the treatment facilities follows the same patterns as in stage A4.

Table S8 and Table S9 show the calculated construction and demolition waste (CDW), along with the chosen treatment option for the circular and conventional buildings respectively. In this study, losses stemming from the demolition of concrete buildings are not taken into account. For the circular buildings, after deconstruction the materials are collected back and stored until they are reused in the construction sector, meaning that no treatment is considered for them. CDW from the conventional buildings are mostly processed in a sorting facility and some of the collected materials receive no treatment at all as in the circular buildings and they remain stored until reused directly in another project. No direct landfilling of primary CDW is taking place in this study.

**Table S8.** Generated CDW of circular buildings.

| Materials             | Weight (tons) |           |           |             |             |             | Treatment               | Post treatment use |
|-----------------------|---------------|-----------|-----------|-------------|-------------|-------------|-------------------------|--------------------|
|                       | 1-floor SFH   |           |           | 2-floor SFH | 3-floor SFH | 3-floor MFH |                         |                    |
|                       | ESR = 1       | ESR = 1.5 | ESR = 2.5 | ESR = 1.5   | ESR = 1.5   | ESR = 1.5   |                         |                    |
|                       |               |           |           |             |             |             |                         |                    |
| Wooden facade         | 1.99          | 2.04      | 2.21      | 2.77        | 3.28        | 7.05        | No treatment considered | Reuse              |
| Wooden formwork       | 10.54         | 10.80     | 11.00     | 16.42       | 17.80       | 50.89       |                         |                    |
| Wooden beams          | 9.26          | 9.58      | 9.26      | 7.60        | 13.41       | 18.75       |                         |                    |
| Stonewool insulation  | 8.69          | 8.80      | 8.93      | 7.98        | 7.88        | 27.34       |                         |                    |
| Vapor barrier         | 0.09          | 0.09      | 0.09      | 0.08        | 0.08        | 0.23        |                         |                    |
| Straw mushroom panels | 0.80          | 0.97      | 0.99      | 0.77        | 1.28        | 4.92        |                         |                    |
| Ceiling boards        | 5.76          | 5.76      | 5.76      | 8.64        | 9.60        | 36.00       |                         |                    |
| Wooden floor          | 1.80          | 1.80      | 1.80      | 0.90        | 0.60        | 2.25        |                         |                    |
| Cooper roof           | 0.60          | 0.60      | 0.60      | 0.30        | 0.20        | 0.75        |                         |                    |
| Double glazing        | 0.61          | 0.61      | 0.69      | 1.23        | 1.84        | 1.85        |                         |                    |
| UV foil               | 0.03          | 0.03      | 0.03      | 0.04        | 0.04        | 0.10        |                         |                    |
| Total                 | 40.17         | 41.08     | 41.36     | 46.73       | 56.00       | 150.13      | -                       | -                  |

**Table S9.** Generated CDW of conventional buildings.

| Materials               | Weight (tons) |         |         | Treatment     | Post treatment use |
|-------------------------|---------------|---------|---------|---------------|--------------------|
|                         | 1-floor       | 2-floor | 3-floor |               |                    |
| Wooden protective layer | 1.96          | 2.66    | 3.15    | -             | Reuse              |
| Concrete                | 167.26        | 153.91  | 153.81  | Sorting plant | Sand & limestone   |
| Wooden beams (30X60 mm) | 0.14          | 0.20    | 0.25    | -             | Reuse              |
| EPS                     | 2.55          | 2.38    | 2.42    | -             | Reuse              |
| Vapor barrier           | 0.02          | 0.02    | 0.02    | -             | Reuse              |



|                   |        |        |        |               |                  |
|-------------------|--------|--------|--------|---------------|------------------|
| Gypsum fiberboard | 0.95   | 1.07   | 1.20   | Sorting plant | gypsum recovery  |
| Bricks            | 20.57  | 23.19  | 26.13  | Sorting plant | Sand & limestone |
| Stucco            | 1.61   | 1.81   | 2.04   | Sorting plant | Sand & limestone |
| Cover plaster     | 1.07   | 1.21   | 1.36   | Sorting plant | -                |
| Wooden formwork   | 0.00   | 0.90   | 1.20   | -             | Reuse            |
| Cement            | 17.76  | 8.88   | 5.92   | Sorting plant | Reuse            |
| Aggregates        | 12.00  | 6.00   | 4.00   | -             | Reuse            |
| Bitumen           | 1.58   | 0.79   | 0.53   | Incineration  | -                |
| Reinforcing steel | 5.43   | 4.99   | 4.99   | recycling     | Reuse            |
| Double glazing    | 0.61   | 1.23   | 1.84   | recycling     | Reuse            |
| Total             | 233.51 | 209.24 | 208.86 | -             | -                |

95

## 96 2.7. Reuse / recovery potential (D)

97 This stage of the LCA reports the avoided environmental impact resulting from recycling and/or reuse of materials after building demolition. More specifically, the extracted fractions from the end-of-life treatment of the materials – not going to landfill  
98  
99 - serve as inputs to this stage and the net (negative) impact originates from avoiding  
100 production of the original material for the specified use outside of the system boundaries (e.g another construction). Table S8 and Table S9 illustrates in a summarized form  
101 the specified (post-treatment) use of materials in other projects for circular and conventional buildings.  
102  
103  
104

105 Pertaining to the concrete buildings, inert materials are crushed in sorting facilities in  
106 order to recover sand (70%) and limestone (30%). Direct reuse is hypothesized only for  
107 the wooden protective layer, vapor barrier, aggregates from the roof and the recycled  
108 reinforced steel. Energy recovery from incineration of materials is not considered in  
109 this study, as the focus is strictly on the material side.

### 3. Results

**Table S10.** Life-cycle impacts of the model buildings per each indicator (CED, GWP and EC) and life-cycle stage.

| Indicator                   | CED - Cumulative Energy Demand (MJ-eq / (m <sup>2</sup> ×a))                  |        |        |          |        |        |        |        |         |
|-----------------------------|-------------------------------------------------------------------------------|--------|--------|----------|--------|--------|--------|--------|---------|
| Geometry & type of building | Conventional                                                                  |        |        | Circular |        |        |        |        |         |
|                             | SFH 1                                                                         | SFH 2  | SFH 3  | SFH 1    | SFH 1  | SFH 1  | SFH 2  | SFH 3  | MFH     |
|                             | - 1.5                                                                         | - 1.5  | - 1.5  | - 1      | - 1.5  | - 2.5  | - 1.5  | - 1.5  | 3 - 1.5 |
| Production (A1-3)           | 77.84                                                                         | 72.26  | 71.96  | 52.16    | 52.91  | 53.63  | 61.76  | 68.11  | 54.75   |
| Transport (A4)              | 26.24                                                                         | 23.51  | 23.47  | 4.51     | 4.62   | 4.65   | 5.25   | 6.29   | 4.50    |
| Construction (A5)           | 0.41                                                                          | 0.41   | 0.41   | 0.21     | 0.21   | 0.21   | 0.21   | 0.21   | 0.09    |
| Replacement (B4)            | 2.59                                                                          | 4.22   | 5.68   | 3.27     | 3.32   | 3.67   | 5.17   | 6.78   | 2.93    |
| Energy consumption (B6)     | 243.64                                                                        | 243.64 | 243.64 | 243.64   | 243.64 | 243.64 | 243.64 | 243.64 | 242.50  |
| Deconstruction (C1)         | 0.14                                                                          | 0.14   | 0.14   | 0.01     | 0.01   | 0.01   | 0.01   | 0.01   | 0.00    |
| Transport (C2)              | 26.24                                                                         | 23.51  | 23.47  | 4.51     | 4.62   | 4.65   | 5.25   | 6.29   | 4.50    |
| Treatment (C3)              | 2.43                                                                          | 2.15   | 2.12   | 0.00     | 0.00   | 0.00   | 0.00   | 0.00   | 0.00    |
| Reuse potential (D)         | -54.33                                                                        | -53.17 | -55.40 | -52.16   | -52.91 | -53.63 | -61.76 | -68.11 | -54.75  |
| Total                       | 379.54                                                                        | 369.85 | 370.90 | 308.31   | 309.33 | 310.46 | 321.29 | 331.33 | 309.27  |
| Indicator                   | GWP - Global Warming Potential (kg CO <sub>2</sub> -Eq / (m <sup>2</sup> ×a)) |        |        |          |        |        |        |        |         |
| Geometry & type of building | Concrete                                                                      |        |        | Wooden   |        |        |        |        |         |
|                             | SFH 1                                                                         | SFH 2  | SFH 3  | SFH 1    | SFH 1  | SFH 1  | SFH 2  | SFH 3  | MFH     |
|                             | - 1.5                                                                         | - 1.5  | - 1.5  | - 1      | - 1.5  | - 2.5  | - 1.5  | - 1.5  | 3 - 1.5 |
| Production (A1-3)           | 5.48                                                                          | 5.31   | 5.31   | 3.62     | 3.68   | 3.76   | 4.26   | 4.77   | 3.62    |
| Transport (A4)              | 1.68                                                                          | 1.51   | 1.50   | 0.29     | 0.30   | 0.30   | 0.34   | 0.40   | 0.29    |
| Construction (A5)           | 0.03                                                                          | 0.03   | 0.03   | 0.01     | 0.01   | 0.01   | 0.01   | 0.01   | 0.01    |
| Replacement (B4)            | 0.20                                                                          | 0.32   | 0.44   | 0.68     | 0.69   | 0.76   | 1.00   | 1.23   | 0.63    |
| Energy consumption (B6)     | 5.47                                                                          | 5.47   | 5.47   | 5.47     | 5.47   | 5.47   | 5.47   | 5.47   | 5.61    |
| Deconstruction (C1)         | 0.01                                                                          | 0.01   | 0.01   | 0.00     | 0.00   | 0.00   | 0.00   | 0.00   | 0.00    |
| Transport (C2)              | 1.68                                                                          | 1.51   | 1.50   | 0.29     | 0.30   | 0.30   | 0.34   | 0.40   | 0.29    |
| Treatment (C3)              | 0.63                                                                          | 0.36   | 0.27   | 0.00     | 0.00   | 0.00   | 0.00   | 0.00   | 0.00    |
| Reuse potential (D)         | -3.14                                                                         | -3.09  | -3.23  | -3.62    | -3.68  | -3.76  | -4.26  | -4.77  | -3.62   |
| Total                       | 15.18                                                                         | 14.51  | 14.54  | 10.36    | 10.45  | 10.61  | 11.42  | 12.29  | 10.44   |
| Indicator                   | EC - Ecological Scarcity (Eco-points/(m <sup>2</sup> ×a))                     |        |        |          |        |        |        |        |         |
| Geometry & type of building | Concrete                                                                      |        |        | Wooden   |        |        |        |        |         |
|                             | SFH 1                                                                         | SFH 2  | SFH 3  | SFH 1    | SFH 1  | SFH 1  | SFH 2  | SFH 3  | MFH     |
|                             | - 1.5                                                                         | - 1.5  | - 1.5  | - 1      | - 1.5  | - 2.5  | - 1.5  | - 1.5  | 3 - 1.5 |
| Production (A1-3)           | 7229                                                                          | 7021   | 7052   | 5868     | 5966   | 6058   | 6806   | 7698   | 5931    |
| Transport (A4)              | 1737                                                                          | 1556   | 1553   | 299      | 306    | 308    | 348    | 417    | 298     |
| Construction (A5)           | 29                                                                            | 29     | 29     | 15       | 15     | 15     | 15     | 15     | 6       |
| Replacement (B4)            | 298                                                                           | 468    | 625    | 899      | 918    | 1001   | 1307   | 1605   | 829     |
| Energy consumption (B6)     | 10165                                                                         | 10165  | 10165  | 10165    | 10165  | 10165  | 10165  | 10165  | 10230   |
| Deconstruction (C1)         | 10                                                                            | 10     | 10     | 0        | 0      | 0      | 0      | 0      | 0       |
| Transport (C2)              | 1737                                                                          | 1556   | 1553   | 299      | 306    | 308    | 348    | 417    | 298     |
| Treatment (C3)              | 738                                                                           | 565    | 523    | 0        | 0      | 0      | 0      | 0      | 0       |
| Reuse potential (D)         | -4897                                                                         | -4774  | -4957  | -5868    | -5966  | -6058  | -6806  | -7698  | -5931   |
| Total                       | 21943                                                                         | 21370  | 21510  | 17546    | 17677  | 17856  | 18990  | 20318  | 17593   |

#### 4. References

- Bundesamt für Statistik. (2017). *Bau- und Wohnungswesen 2015*. Neuchâtel, Switzerland: Bundesamt für Statistik (BFS) Retrieved from <https://www.bfs.admin.ch/bfs/de/home/statistiken/kataloge-datenbanken/publikationen.assetdetail.2341518.html>.
- Ecoinvent Data v3.4-Recycled-Content System Model. (2017). from Ecoinvent Association [www.ecoinvent.org](http://www.ecoinvent.org)
- KBOB. (2014). *Ökobilanzdaten im Baubereich*. Retrieved from Bern, Switzerland: [https://www.kbob.admin.ch/kbob/de/home/publikationen/nachhaltiges-bauen/oekobilanzdaten\\_baubereich.html](https://www.kbob.admin.ch/kbob/de/home/publikationen/nachhaltiges-bauen/oekobilanzdaten_baubereich.html)
- SIA, M. (2010). Graue Energie von Gebäuden. In *SchweizerischerIngenieur-und Architektenverein (SIA)*. Zürich, Switzerland.
- SIA, M. (2015). Raumnutzungsdaten für Energie- und Gebäudetechnik. In *SchweizerischerIngenieur-und Architektenverein (SIA)*. Zürich, Switzerland.
